# Supplementary material
Source: ML conference proceedings conference paper supplement (https://openreview.net/forum?id=XFSCKELP3bp)
Supplement: supplementary_material [file attachment]

# YOUR CONTRASTIVE LEARNING IS SECRETLY DOING STOCHASTIC NEIGHBOR EMBEDDING

**Anonymous authors**

Paper under double-blind review

## ABSTRACT

Contrastive learning, especially self-supervised contrastive learning (SSCL), has achieved great success in extracting powerful features from unlabeled data. In this work, we contribute to the theoretical understanding of SSCL and uncover its connection to the classic data visualization method, stochastic neighbor embedding (SNE) (Hinton & Roweis, 2002), whose goal is preserving pairwise distances. In the perspective of preserving neighboring information, SSCL can be viewed as a special case of SNE with the input space pairwise similarities specified by data augmentation. The established correspondence facilitates deeper theoretical understanding of learned features of SSCL, as well as methodological guidelines for practical improvement. Specifically, through the lens of SNE, we provide novel analysis on domain-agnostic augmentations, implicit bias and robustness of learned features. To illustrate the practical advantage, we demonstrate that the modifications from SNE to t-SNE (Van der Maaten & Hinton, 2008) can also be adopted in the SSCL setting, achieving significant improvement in both in-distribution and out-of-distribution generalization.

## 1 INTRODUCTION

Recently, contrastive learning, especially self-supervised contrastive learning (SSCL) has drawn massive attention, with many state-of-the-art models following this paradigm in both computer vision (He et al., 2020a; Chen et al., 2020a,b; Grill et al., 2020; Chen & He, 2021; Zbontar et al., 2021) and natural language processing (Fang et al., 2020; Wu et al., 2020; Giorgi et al., 2020; Gao et al., 2021; Yan et al., 2021). In contrast to supervised learning, SSCL learns the representation through a large number of unlabeled data and artificially defined self-supervision signals, i.e., regarding the augmented views of a data sample as positive pairs and randomly sampled data as negative pairs. By enforcing the features of positive pairs to align and those of negative pairs to be distant, SSCL produces discriminative features with the state-of-the-art performance for various downstream tasks.

Despite the empirical success, the theoretical understanding is under-explored as to how the learned features depend on the data and augmentation, how different components in SSCL work and what are the implicit biases when there exist multiple empirical loss minimizers. Without proper understanding, practical applications might be inefficient and unreliable. For instance, SSCL methods are widely adopted for pretraining, whose feature mappings are to be utilized for various downstream tasks which are usually out-of-distribution (OOD). The distribution shift poses great challenges for the feature learning process with extra requirement for robustness and OOD generalization (Arjovsky et al., 2019; Krueger et al., 2021; Bai et al., 2021; He et al., 2020b), which demands deeper understanding of the SSCL methods.

The goal of SSCL is to learn the feature representations from data. For this problem, one classic method is SNE (Hinton et al., 2006) and its various extensions. Specially, t-SNE (Van der Maaten & Hinton, 2008) has become the go-to choice for low-dimensional data visualization. Comparing to SSCL, SNE is far better explored in terms of theoretical understanding (Arora et al., 2018; Linderman & Steinerberger, 2019; Cai & Ma, 2021). However, its empirical performance is not satisfactory, especially in modern era where data are overly complicated. Both trying to learn feature representations, are there any deep connections between SSCL and SNE? Can SSCL take the advantage of the theoretical soundness of SNE? Can SNE be revived in the modern era by incorporating SSCL?

In this work, we give affirmative answers to the above questions and demonstrate how the connections to SNE can benefit the theoretical understandings of SSCL, as well as provide methodological guidelines for practical improvement. The main contributions are summarized below.

- We propose a novel perspective that interprets SSCL methods as a type of SNE methods with the aim of preserving pairwise similarities specified by the data augmentation.
- The discovered connection enables deeper understanding of SSCL methods. We provide novel theoretical insights for domain-agnostic data augmentation, implicit bias and OOD generalization. Specifically, we show isotropic random noise augmentation induces  $l_2$  similarity while mixup noise can potentially adapt to low-dimensional structures of data; we investigate the implicit bias from the angle of order preserving and identified the connection between minimizing the expected Lipschitz constant of the SSCL feature map and SNE with uniformity constraint; we identify that the popular cosine similarity can be harmful for OOD generalization.
- Motivated by the SNE perspective, we propose several modifications to existing SSCL methods and demonstrate practical improvements. Besides a re-weighting scheme, we advocate to lose the spherical constraint for improved OOD performance and a t-SNE style matching for improved separation. Through comprehensive numerical experiments, we show that the modified  $t$ -SimCLR outperforms the baseline with 90% less feature dimensions on CIFAR-10 and  $t$ -MoCo-v2 pretrained on ImageNet significantly outperforms in various domain transfer and OOD tasks.

## 2 PRELIMINARY AND RELATED WORK

**Notations.** For a function  $f: \Omega \rightarrow \mathbb{R}$ , let  $\|f\|_\infty = \sup_{x \in \Omega} |f(x)|$  and  $\|f\|_p = (\int_\Omega |f(x)|^p dx)^{1/p}$ . For a vector  $x$ ,  $\|x\|_p$  denotes its  $p$ -norm, for  $1 \leq p \leq \infty$ .  $\mathbb{P}(A)$  is the probability of event  $A$ . For a random variable  $z$ , we use  $P_z$  and  $p_z$  to denote its probability distribution and density respectively. Denote Gaussian distribution by  $N(\mu, \Sigma)$  and let  $I_d$  be the  $d \times d$  identity matrix. Let the dataset be  $\mathcal{D}_n = \{x_1, \dots, x_n\} \subset \mathbb{R}^d$  where each  $x_i$  independently follows distribution  $P_x$ . The goal of unsupervised representation learning is to find informative low-dimensional features  $z_1, \dots, z_n \in \mathbb{R}^{d_z}$  of  $\mathcal{D}_n$  where  $d_z$  is usually much smaller than  $d$ . We use  $f(x)$  to as the default notation for the feature mapping from  $\mathbb{R}^d \rightarrow \mathbb{R}^{d_z}$ , i.e.,  $z_i = f(x_i)$ .

**Stochastic neighbor embedding.** SNE (Hinton & Roweis, 2002) is a powerful representation learning framework designed for visualizing high-dimensional data in low dimensions by preserving neighboring information. The training process can be conceptually decomposed into the following two steps: (1) calculate the pairwise similarity matrix  $P \in \mathbb{R}^{n \times n}$  for  $\mathcal{D}_n$ ; (2) optimize features  $z_1, \dots, z_n$  such that their pairwise similarity matrix  $Q \in \mathbb{R}^{n \times n}$  matches  $P$ .

Under the general guidelines lie plentiful details. In Hinton & Roweis (2002), the pairwise similarity is modeled as conditional probabilities of  $x_j$  being the neighbor of  $x_i$ , which is specified by a Gaussian distribution centered at  $x_i$ , i.e., when  $i \neq j$ ,

$$P_{j|i} = \frac{\exp(-\|x_i - x_j\|_2^2 / 2\sigma_i^2)}{\sum_{k \neq i} \exp(-\|x_i - x_k\|_2^2 / 2\sigma_i^2)}, \quad (2.1)$$

where  $\sigma_i$  is the variance of the Gaussian that is centered at  $x_i$ . Similar conditional probabilities  $Q_{j|i}$ 's can be defined on the feature space. When matching  $Q$  to  $P$ , the measurement chosen is the KL-divergence between two conditional probabilities. The overall training objective for SNE is

$$\inf_{z_1, \dots, z_n} \sum_{i=1}^n \sum_{j=1}^n P_{j|i} \log \frac{P_{j|i}}{Q_{j|i}}. \quad (2.2)$$

Significant improvements have been made to the classic SNE. Im et al. (2018) generalized the KL-divergence to  $f$ -divergence and found that different divergences favors different types of structure. Lu et al. (2019) proposed to make  $P$  doubly stochastic so that features are less crowded. Most notably, t-SNE (Van der Maaten & Hinton, 2008) modified the pairwise similarity by considering joint distribution rather than conditional, and utilizes t-distribution instead of Gaussian in the feature space modeling. It is worth noting that SNE belongs to a large class of methods called manifold learning (Li et al., 2022). In this work, we specifically consider SNE. If no confusion arises, we use SNE to denote the specific work of Hinton & Roweis (2002) and this type of methods in general interchangeably.

**Self-supervised contrastive learning.** The key part of SSCL is the construction of positive pairs, or usually referred to as different views of the same sample. For each  $x_i$  in the training data, denote its two augmented views to be  $x'_i$  and  $x''_i$ . Let  $\mathcal{D}'_n = \{x'_1, \dots, x'_n\}$ ,  $\mathcal{D}''_n = \{x''_1, \dots, x''_n\}$  and define

$$l(x'_i, x''_i) = -\log \frac{\exp(\text{sim}(f(x'_i), f(x''_i))/\tau)}{\sum_{x \in \mathcal{D}'_n \cup \mathcal{D}''_n \setminus \{x'_i\}} \exp(\text{sim}(f(x'_i), f(x))/\tau)},$$

where  $\text{sim}(z_1, z_2) = \langle \frac{z_1}{\|z_1\|_2}, \frac{z_2}{\|z_2\|_2} \rangle$  denotes the cosine similarity and  $\tau$  is a temperature parameter. The training objective of the popular SimCLR (Chen et al., 2020a) is  $L_{\text{InfoNCE}} := \frac{1}{2n} \sum_{i=1}^n (l(\mathbf{x}_i'', \mathbf{x}_i') + l(\mathbf{x}_i', \mathbf{x}_i''))$ .

Recently, various algorithms are proposed to improve the above contrastive learning. In order to eliminate the need for the large batch size, MoCo (He et al., 2020a; Chen et al., 2020b) utilizes a moving-averaged encoder and a dynamic memory bank to store negative representations, making it more device-friendly. Grill et al. (2020); Chen & He (2021); Zbontar et al. (2021) radically discard negative samples in SSCL but still achieve satisfactory transfer performance. Another line of works (Caron et al., 2020; Li et al., 2021) mines the hierarchy information in data to derive more semantically compact representations. Radford et al. (2021); Yao et al. (2021) even extend the contrastive methods to the multi-modality data structure to achieve significant zero-shot results.

**Theoretical understanding of SSCL.** In contrast of the empirical success, theoretical understanding of SSCL is still limited. While most of theoretical works (Arora et al., 2019; Tosh et al., 2020; HaoChen et al., 2021, 2022; Wang et al., 2022; Wen & Li, 2021; Wei et al., 2020; Huang et al., 2021; Ji et al., 2021) focus on its generalization ability on downstream tasks, there are some works studying specifically the InfoNCE loss. One line of works (Oord et al., 2018; Bachman et al., 2019; Hjelm et al., 2018; Tian et al., 2019, 2020) understand the InfoNCE loss from mutual information perspective, showing that the negative InfoNCE is a lower bound of mutual information between positive samples. Other works (Wang & Isola, 2020; Huang et al., 2021; Jing et al., 2021) are from the perspective of geometry of embedding space, showing that InfoNCE can be divided into two parts: one controls alignment and the other prevents representation collapse. In this paper, we study SSCL from the SNE perspective, which, to the best of the authors' knowledge, has no discussion in existing literature. The closest work to ours is Balestrieri & LeCun (2022), which proposed a unifying framework under the helm of spectral manifold learning. In comparison, our work focus specifically on the connection between SSCL and SNE.

### 3 SNE PERSPECTIVE OF SSCL

A closer look at the training objectives of SNE and SimCLR reveals great resemblance — SimCLR can be seen as a special SNE model. To see this, denote  $\hat{\mathcal{D}}_{2n} = \mathcal{D}_n'' \cup \mathcal{D}_n'$  as the augmented dataset with index  $\hat{x}_{2i-1} = \mathbf{x}_i''$  and  $\hat{x}_{2i} = \mathbf{x}_i'$ . If we change the  $l_2$  distance to the negative cosine similarity and let  $\sigma_i^2 \equiv \tau$ . Admitting similar conditional probability formulation as in (2.2) yields that for  $i \neq j$ ,

$$\tilde{Q}_{j|i} = \frac{\exp(\text{sim}(f(\tilde{\mathbf{x}}_i), f(\tilde{\mathbf{x}}_j))/\tau)}{\sum_{k \neq i} \exp(\text{sim}(f(\tilde{\mathbf{x}}_i), f(\tilde{\mathbf{x}}_k))/\tau)}.$$

By taking

$$\tilde{P}_{j|i} = \begin{cases} 1, & \text{if } \tilde{\mathbf{x}}_i \text{ and } \tilde{\mathbf{x}}_j \text{ are positive pairs} \\ 0, & \text{otherwise,} \end{cases} \quad (3.1)$$

the SNE objective (2.2) can be written as

$$\begin{aligned} \sum_{i=1}^{2n} \sum_{j=1}^{2n} \tilde{P}_{j|i} \log \frac{\tilde{P}_{j|i}}{\tilde{Q}_{j|i}} &= \sum_{k=1}^n \left( \tilde{P}_{2k-1|2k} \log \frac{\tilde{P}_{2k-1|2k}}{\tilde{Q}_{2k-1|2k}} + \tilde{P}_{2k|2k-1} \log \frac{\tilde{P}_{2k|2k-1}}{\tilde{Q}_{2k|2k-1}} \right) \\ &= \sum_{k=1}^n \left( -\log(\tilde{Q}_{2k-1|2k}) - \log(\tilde{Q}_{2k|2k-1}) \right), \end{aligned}$$

which reduces to the SimCLR objective  $L_{\text{InfoNCE}}$ , up to a **constant scaling term** only depending on  $n$ .

Now that we have established the correspondence between SNE and SimCLR, it's clear that the feature learning process of SSCL also follows the two steps of SNE.

- (S1) The positive pair construction specifies the similarity matrix  $\mathbf{P}$ .
- (S2) The training process then matches  $\mathbf{Q}$  to  $\mathbf{P}$  by minimizing some divergence between the two specified by the training objective, e.g., KL divergence in SimCLR.

The main difference between SNE and SSCL is the first part, where the  $\mathbf{P}$  in SNE is usually densely filled by  $l_p$  distance, ignoring the semantic information within rich data like images and texts. In

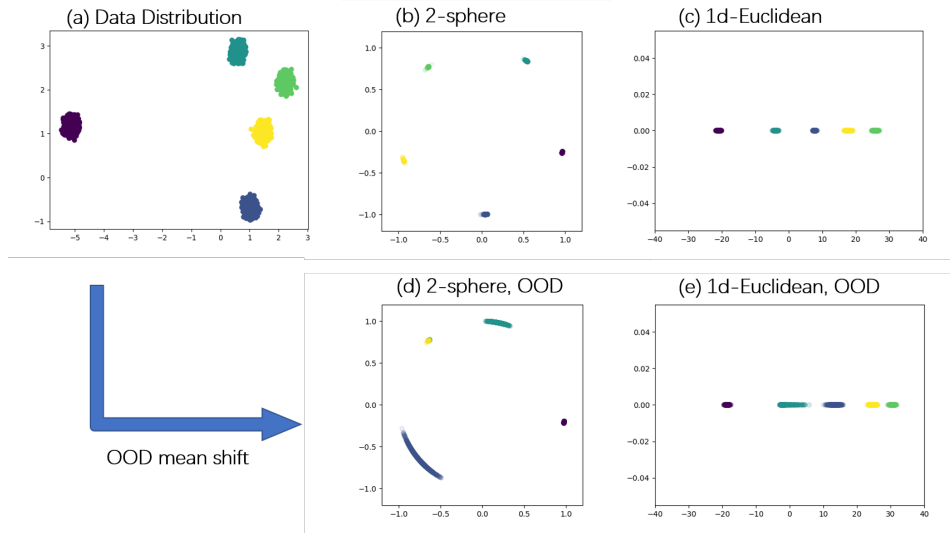

Figure 1: Gaussian mixture model with 5 components. (a) illustration of data with 250 samples. (b) learned features by standard SimCLR with normalization (cosine similarity) to 1-sphere. (c) learned features by modified SimCLR without normalization ( $l_2$  similarity). (d, e) feature mapping of the two methods in case of OOD mean shift. The linear classification accuracy is 48.4% in (d) and 100% in (e).

contrast, SSCL omits all traditional distances in  $\mathbb{R}^d$  and only specifies semantic similarity through data augmentation, and the resulting  $\mathbf{P}$  is sparsely filled only by positive pairs as in (3.1). For structurally rich data such as image or text, the semantic information is invariant to a wide range of transformations. Human’s prior knowledge of such invariance guides the construction of positive pairs in SSCL, which is then learned by the feature mapping.

**Remark 3.1** (SNE vs SSCL). We would like to clarify on the main difference between SNE and SSCL that we focus in this work. Although standard SNE (Hinton et al., 2006) is *non-parametric* without explicit feature maps, and is optimized for the *whole dataset*, these are not the defining properties of SNE. SNE can also utilize explicit feature maps and mini-batch training (Van Der Maaten, 2009). On the other hand, SSCL can also benefit from larger/full batches (Chen et al., 2020a) and can also be modified to directly optimize the features  $\mathbf{z}_i$ ’s. In this work, we omit these subtleties<sup>1</sup> and focus on the (S1) perspective, which we view as the most significant difference between SNE and SSCL.

### 3.1 ANALYSIS

In this section, to showcase the utility of the SNE perspective, we demonstrate how the feature learning process of SSCL methods, e.g., SimCLR, can become more intuitive and transparent. Specifically, we re-derive the alignment and uniformity principle (Wang & Isola, 2020) as well as provide novel analysis on domain-agnostic augmentations, the implicit bias and robustness of learned features. To aid the illustration, we devise toy examples with simulated Gaussian mixture data.

**Gaussian mixture setting.** Let the data follow  $d$ -dimensional Gaussian mixture distribution with  $m$  components where  $P_{\mathbf{x}} \sim \frac{1}{m} \sum_{i=1}^m N(\boldsymbol{\mu}_i, \sigma^2 \mathbf{I}_d)$ . The special case with  $d = 2$ ,  $m = 5$ ,  $\sigma = 0.1$  is illustrated in Figure 1(a) with 250 independent samples. To apply contrastive methods, consider constructing positive pairs by direct sampling, i.e., if  $\mathbf{x}$  is from the first component, then we sample another  $\mathbf{x}' \sim N(\boldsymbol{\mu}_1, \sigma^2 \mathbf{I}_d)$  independently as its alternative view for contrast. The negative samples are the same as in standard SimCLR training, i.e., in one batch, for one anchor, the negative pairs are all samples that is not its positive pair.

It should be noted that the Gaussian mixture setting mainly serves as a proof of concept for intuitive illustrations. Our theoretical development, e.g., Corollary 3.6 is general and not restricted to the Gaussian mixture setting.

<sup>1</sup>All the contrastive losses are written in full batches for simplicity in this work as we focus on analyzing the optimal solutions of SSCL methods rather than the optimization process.

### 3.1.1 DOMAIN-AGNOSTIC DATA AUGMENTATION

Now that we have established in (S1) that the input space pairwise distance is specified by the data augmentation, a natural question to ask is what are the induced distances. In this section, we investigate this problem for *domain-agnostic* data augmentations.

The quality of data augmentation has great impact on the performance of SSCL methods, which reflects our prior knowledge on the data. However, when facing new data without any domain knowledge, we have to rely on domain-agnostic data augmentations, e.g., adding random noises (Verma et al., 2021), for contrast. We first consider using general random noise augmentation, i.e., for any  $\mathbf{x} \in \mathbb{R}^d$ , let  $\mathbf{x}' = \mathbf{x} + \delta$  where  $\delta$  follows some distribution with density  $\phi(\mathbf{x})$ . Then, for any  $\mathbf{x}_i$ , the probability density of having  $\mathbf{t} \in \mathbb{R}^d$  as its augmented point can be characterized as  $P_{\mathbf{t}|\mathbf{x}_i} = \mathbb{P}(\mathbf{x}_i \text{ and } \mathbf{x}'_i = \mathbf{t} \text{ form a positive pair} | \mathbf{x}_i) = \phi(\mathbf{t} - \mathbf{x}_i)$ . We have the following proposition on Gaussian-induced distance.

**Proposition 3.2** (Gaussian noise injection). If the noise distribution is isotropic Gaussian, the induced distance is *equivalent* to the  $l_2$  distance in  $\mathbb{R}^d$ , up to a monotone transformation.

Another popular noise injection method is the mixup (Zhang et al., 2017), where the augmented data are comprised of convex combinations of the training data. For each  $\mathbf{x}_i$ , a positive pair can be constructed from another  $\mathbf{x}_j$  such that  $\mathbf{x}'_i = \mathbf{x}_i + \lambda(\mathbf{x}_j - \mathbf{x}_i)$  and  $\lambda \in (0, 1)$  is the hyperparameter usually modeled with Beta distribution. For independent  $\mathbf{x}_1, \mathbf{x}_2 \sim P_x$ , denote the convoluted density of  $\lambda(\mathbf{x}_1 - \mathbf{x}_2)$  as  $p_\lambda(\mathbf{x})$ , which is symmetric around 0. Then, if employing mixup for positive pairs in SSCL, the induced distance can be written as  $P_{\mathbf{x}_1, \mathbf{x}_2} = P_{\mathbf{x}_2, \mathbf{x}_1} = p_\lambda(\mathbf{x}_1 - \mathbf{x}_2)$ .

**Gaussian vs. mixup.** Verma et al. (2021) proposed to use mixup when domain-specific information is unattainable and provided supportive analysis on its advantage over isotropic Gaussian noise from the classification generalization error point of view. Through (S1) perspective, we can intuitively explain why data-dependent mixup noises can be potentially better from the perspective of the “*curse of dimensionality*”. Consider the  $d$ -dimensional Gaussian mixture setting with  $m < d$  separated components. Notice that  $\mu_1, \dots, \mu_m$  can take up at most  $(m - 1)$ -dimensional linear sub-space of  $\mathbb{R}^d$ . Denoted the space spanned by  $\mu_i$ ’s as  $S_\mu$ . For the light-tailed Gaussian distribution, and the majority of samples will be close to  $S_\mu$ . Hence, majority of the convoluted density  $p_\lambda(\mathbf{x})$  will also be supported on  $S_\mu$ , so does the corresponding  $P_{\mathbf{x}_2, \mathbf{x}_1}$ . Thus, the induced distance from mixup will omit irrelevant variations in the complement of  $S_\mu$  and focus on the low-dimensional sub-space  $S_\mu$  where  $\mu_i$ ’s actually differ. This effectively reduces the dimension dependence from  $d$  to  $m - 1$ . In comparison, isotropic Gaussian noise induces  $l_2$  distance for positive pairs with support of  $\mathbb{R}^d$ , which will be much more inefficient, especially when  $m \ll d$ . Since it is well-known that the performance of regression or classification models is strongly influenced by the intrinsic dimension of the input space (Hamm & Steinwart, 2021), keeping the data in a low-dimensional space is preferable.

### 3.1.2 ALIGNMENT AND UNIFORMITY

Characterizing the learned features of SSCL is of critical importance. Wang & Isola (2020) proposed alignment and uniformity as principles for SimCLR type contrastive learning methods. Such results can be intuitively understood through the perspective of (S1) and (S2).

Consider the common case where the feature space is  $(d_z - 1)$ -sphere. First, (3.1) indicates that only similarities (distances) between positive pairs are non-zero (finite) and all other pairwise similarities (distances) are zero (infinity). Preserving (3.1) requires the features of positive pairs to align (cosine similarity tends to 1) and those of negative pairs to be as distant as possible. If in the extreme case where positive pairs match exactly, i.e.,  $f(\mathbf{x}_i) = f(\mathbf{x}'_i)$  for any  $i = 1, \dots, n$ , we call it *perfect alignment*.

If perfect alignment is achieved and the features are constrained on the unit sphere, matching (3.1) implies pushing  $n$  points on the feature space as distant as possible. Maximally separated  $n$  points on a  $d$ -sphere has been studied in geometry, known as the Tammes problem (Tammes, 1930; Erber & Hockney, 1991; Melisseny, 1998). We say *perfect uniformity* is achieved if all the pairs are maximally separated on the sphere. There are some simple cases of the Tammes problem. If  $d = 2$ , perfect uniformity can be achieved if the mapped points form a regular polygon. If  $d \geq n - 1$ , the solution can be given by the vertices of an  $(n - 1)$ -simplex, inscribed in an  $(n - 1)$ -sphere embedded in  $\mathbb{R}^d$ .



The cosine similarity between any two vertices is  $-1/(n-1)$  and in this case,  $L_{\text{InfoNCE}}$  can attain its lower bound<sup>2</sup>. As  $n \rightarrow \infty$ , the point distribution converges weakly to uniform distribution.

As can be seen in Figure I(a, b), perfect alignment and perfect uniformity are almost achieved by standard SimCLR in the Gaussian mixture setting.

### 3.1.3 IMPLICIT BIAS

Existing theoretical results on SSCL provide justification of its empirical success in classification. However, there's more to it than just separating different classes and many phenomena are left unexplained. Take the popular SimCLR (Chen et al., 2020a) on CIFAR-10 as an example, we can consistently observe that the feature similarities within animals (bird, cat, deer, dog, frog, horse) and within objects (airplane, automobile, ship, truck), are significantly higher than those between animals and objects<sup>3</sup>. This can be viewed as an implicit bias towards preserving semantic information, which might be surprising as we have no supervision on the label information during the training process. However, existing literature on implicit bias is scarce. As advocated in Saunshi et al. (2022), ignoring inductive biases cannot adequately explain the success of contrastive learning. In this section, we provide a simple explanation from the perspective of SNE.

For a more concrete illustration, consider training SimCLR in the Gaussian mixture setting with  $d=1$ ,  $d_z=2$ ,  $m=4$ ,  $\mu_i=i$ , and  $\sigma=0.1$ . Denote the 4 components in ascending order by A,B,C,D. Perfect alignment and uniformity imply that their feature maps (a, b, c, d) on the unit-circle should be vertices of an inscribed square. What left unsaid is their *relative order*. Clockwise from a, regardless of the initialization, we can observe SimCLR to consistently produce the order  $a \rightarrow b \rightarrow c \rightarrow d$ .

**Remark 3.3** (Relative ordering and neighbor-preserving). The order-preserving property showcased with  $d=1$  is mainly for illustration, as in one-dimension, the neighboring info is simplified as the order, which is much easier to understand. The results remain the same in high dimensions as long as the clusters are well separated with an obvious order of clusters. For instance, some relative orders in Figure I(a,b) are also stable, e.g., the neighbor of blue will consistently be purple and yellow.

With great resemblance to SNE, SSCL methods also exhibit neighbor-preserving property and we identify it as an implicit bias. Such implicit bias can be universal in SSCL and the phenomenon in Figure A.3 is also a manifestation. In deep learning, the implicit bias is usually characterized by either closeness to the initialization (Moroshko et al., 2020; Azulay et al., 2021), or minimizing certain complexity (Razin & Cohen, 2020; Zhang et al., 2021). In the case of SimCLR, we hypothesize the implicit bias as the *expected Lipschitz constant*, which has deep connections to SNE with uniformity constraint. For a feature map  $f$  onto the unit-sphere, define

$$C(f) = \mathbb{E}_{\mathbf{x}, \mathbf{x}'} \frac{\|f(\mathbf{x}) - f(\mathbf{x}')\|_2}{\|\mathbf{x} - \mathbf{x}'\|_2}, \quad (3.2)$$

where the  $\mathbf{x}_1, \mathbf{x}_2$  are independent samples from the data distribution.

**Definition 3.4** (SNE with uniformity constraint). Assume data  $\mathbf{x}_1, \dots, \mathbf{x}_n \in \mathbb{R}^d$ . If the corresponding SNE features  $\mathbf{z}_1, \dots, \mathbf{z}_n \in \mathbb{R}^{d_z}$  are constrained to be the maximally separated  $n$  points on the  $(d_z-1)$ -sphere, we call this problem *SNE with uniformity constraint*.

The key of SNE is matching the pairwise similarity matrices  $Q$  to  $P$ . When solving SNE with uniformity constraint, the only thing to be optimized is the pairwise correspondence, or ordering of the mapping. We have the following theorem that links the neighbor-preserving property to  $C(f)$ .

**Theorem 3.5.** Let  $\mathbf{x}_1, \dots, \mathbf{x}_n \in \mathbb{R}^d$  such that  $\|\mathbf{x}_i - \mathbf{x}_j\|_2 > 0$  for any  $i, j$  and let  $\mathbf{z}_1, \dots, \mathbf{z}_n \in \mathbb{R}^{d_z}$  be maximally separated  $n$  points on the  $(d_z-1)$ -sphere. Denote  $P = (p_{ij})_{n \times n}$  and  $Q = (q_{ij})_{n \times n}$  as the corresponding pairwise similarity matrices of  $\mathbf{x}_i$ 's and  $\mathbf{z}_i$ 's respectively. Let  $\pi$  denote a permutation on  $\{1, \dots, n\}$  and denote all such permutations as  $T$ . Let  $Q^\pi$  as the  $\pi$ -permuted matrix  $Q$  and define

$$C_1(P, Q^\pi) = \sum_{i \neq j} \frac{q_{\pi(i)\pi(j)}}{p_{ij}} \quad \text{and} \quad \pi^* = \operatorname{argmin}_{\pi \in T} C_1(P, Q^\pi).$$

<sup>2</sup>Notice that in this case, the optimal feature mapping will contain little information of the data, mapping anchor samples to interchangeable points with identical pairwise distances

<sup>3</sup>Figure A.3 illustrates the phenomenon. Details can be found in Appendix A.1

Then,  $\pi^*$  also minimizes  $\|\bar{P} - Q^\pi\|_F$  where  $\|\cdot\|_F$  is the Frobenius norm and  $\bar{P} = (\bar{p}_{ij})_{n \times n}$  is a (monotonically) transformed similarity matrix with  $\bar{p}_{ij} = -1/p_{ij}$ .

Theorem 3.5 showcases the relationship between minimizing  $C(f)$  and structure preserving property by considering a special SNE problem, where the pairwise similarity is not modeled by Gaussian as standard. Although  $q_{ij} = -\|f(\mathbf{x}_i) - f(\mathbf{x}_j)\|_2$  is unorthodox, it is reasonable since the larger the distance, the smaller the similarity. We have the following corollary to explain the neighbor-preserving property of SSCL and the implicit bias associated with minimizing the complexity  $C(f)$ .

**Corollary 3.6** (Implicit bias of SSCL). When SSCL model achieves perfect alignment and perfect uniformity, if the complexity  $C(f)$  is minimized, the resulting feature map preserves pairwise distance in the input space, resembling SNE with uniformity constraint.

Corollary 3.6 links the implicit bias of SSCL to the SNE optimization with uniformity constraint. In the case of perfect alignment and perfect uniformity, SSCL can be seen as a special SNE problem where the feature  $z_1, \dots, z_n$  must be maximally separated on the unit-sphere. Recall the 1-dimension Gaussian case. There are in total  $3! = 6$  different orderings for the 4 cluster means, among which,  $a \rightarrow b \rightarrow c \rightarrow d$  will give the lowest SNE loss.

When the alignment or uniformity is not perfect, the resulting feature mapping can still be characterized via SNE, with the uniformity constraint relaxed as an regularization. More details can be found in Appendix A. In the case of Figure A.3, Wang & Isola (2020) empirically verified that positive pairs are closed aligned and the marginal distribution of features is close to uniform on the sphere. In our numerical experiments, we observe that  $C(f)$  monotonically decreases during the training process, for both the Gaussian mixture case and the real data case. More details can be found in Appendix A.2. Corollary 3.6 sheds light on the implicit semantic information preserving phenomenon, as in the input space, images of dogs should be closer to images of cats, than airplanes.

### 3.1.4 TARGETING OOD: EUCLIDEAN VS SPHERICAL

Almost all SSCL methods require normalization to the unit-sphere and the similarity on the feature space is often the cosine similarity. In comparison, standard SNE methods operate freely on the Euclidean space. In this section, we show that the normalization can hinder structure-preserving and there is a fundamental *trade off* between in-distribution classification and out-of-domain generalization.

Consider the 2-dimensional Gaussian mixture setting as illustrated in Figure 1(a). Notice that as long as the mixing components are well separated, the learned feature mapping on the sphere will always be the pentagon shape, regardless of the relative locations of the clusters. This is a result of the uniformity property derived under spherical constraint. Distant clusters in the input space will be pulled closer while close clusters will be forced to be more distant. To see the trade off, on one hand, the spherical constraint adds to the complexity of the feature mapping, potentially hurting robustness. On the other hand, close clusters are more separated in the feature space, potentially beneficial for classification.

In Euclidean space, pushing away negative samples (as distant as possible) will be much easier, since the feature vector could diverge towards infinity<sup>4</sup> and the corresponding feature map can potentially preserve more structural information. To verify our intuition, we relax the spherical constraint and change the cosine similarity in SimCLR to the unnormalized inner product in one-dimensional feature space. The learned features are shown in Figure 1(c). Comparing to Figure 1(b), we can get the extra information that the purple cluster is far away to the others. If we introduce a small mean shift to the data, moving the distribution along each dimension by 1, the resulting feature mappings differs significantly in robustness. As illustrated in Figure 1(d) vs. (e), the feature from standard SimCLR are much less robust to OOD shifts and the resulting classification accuracy degrades to only 48.4%, while that for the modified SimCLR maintains 100%. The same OOD advantage can also be verified in the CIFAR-10 to CIFAR-100 OOD generalization case (details in Appendix B.3 Figure B.8) and large-scale real-world scenarios with MoCo (Chen et al., 2020b) as baseline (details in Section 5).

<sup>4</sup>In practice, various regularization, e.g, weight decay, are employed and the resulting features will be bounded.

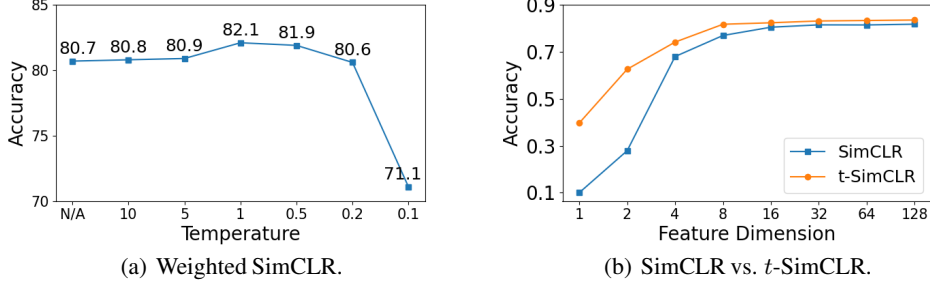

Figure 2: Nearest neighbor classification test accuracy on CIFAR-10 with ResNet-18 after 200 epochs pre-training. (a) "N/A" stands for the baseline SimCLR. The  $x$ -axis is the temperature for IoU weighting scheme. (b) Comparison between SimCLR and  $t$ -SimCLR with different feature dimensions.

## 4 IMPROVING SSCL BY SNE

The proposed SNE perspective (S1,S2) can inspire various modifications to existing SSCL methods. In this section, we choose SimCLR as our baseline and investigate three straightforward modifications. For empirical evaluation, we report the test classification accuracy of nearest neighbor classifiers on both simulated data and real datasets. Experiment details can be found in Appendix B.

### 4.1 WEIGHTED POSITIVE PAIRS

In practice, positive pairs are constructed from anchors (training data), by i.i.d. data augmentations, e.g., random resized crop, random horizontal flip, color jitter, etc. Take random crop as an example, pair 1 and 2 may be from 30%, 80% random crops, respectively. Their similarity should not be treated as equal, as in typical SSCL methods. Incorporating the disparity in the data augmentation process is straightforward in the perspective of SNE, where the InfoNCE loss can be naturally modified as

$$\frac{1}{2n} \sum_{i=1}^n p_{ii'} \cdot (l(\mathbf{x}_i, \mathbf{x}'_i) + l(\mathbf{x}'_i, \mathbf{x}_i)).$$

The weight  $p_{ii'}$  in  $P$  can be specified manually to reflect human's prior knowledge. To test out the effect of such modification, we conduct numerical experiments on CIFAR-10 using the standard SimCLR. The weighting scheme is based on the Intersection over Union (IoU) of random resized crops. For each positive pair, let  $p_{ii'} \propto \exp(\text{IoU}(\mathbf{x}_i, \mathbf{x}'_i) / \tau')$ , where  $\tau' > 0$  is a hyperparameter (temperature) controlling the strength of the weighting scheme, i.e., the bigger the  $\tau'$ , the closer to the unweighted state. The CIFAR-10 test performance vs.  $\tau'$  is shown in Figure 2(a). The baseline is 80.7% and can be significantly improved to 82.1% if choosing  $\tau' = 1$ .

### 4.2 T-SIMCLR: T-SNE STYLE MATCHING

Most SSCL algorithms differ mainly in (S2), i.e., defining  $Q$  and matching it to  $P$ , where fruitful results in SNE literature can be mirrored and applied. Now that we have identified the advantage of modeling features in Euclidean spaces in Section 3.1.4, the most promising modification that follows is to introduce t-SNE to SimCLR. Since we are learning low-dimensional features from high-dimensional data, preserving all pairwise similarities is impossible and the features tend to collapse. This is referred to as the "crowding problem" in Van der Maaten & Hinton (2008) (see Section 3.2 therein). t-SNE utilizes the heavy-tail t-distribution instead of the light-tail Gaussian, to model  $Q$  and encourage separation in feature space. Correspondingly, the training objective  $L_{\text{InfoNCE}}$  can be modified as

$$\frac{1}{n} \sum_{i=1}^n -\log \frac{(1 + \|f(\mathbf{x}_i) - f(\mathbf{x}'_i)\|_2^2 / (\tau t_{df}))^{-(t_{df}+1)/2}}{\sum_{1 \leq j \neq k \leq 2n} (1 + \|f(\tilde{\mathbf{x}}_j) - f(\tilde{\mathbf{x}}_k)\|_2^2 / (\tau t_{df}))^{-(t_{df}+1)/2}}, \quad (4.1)$$

where  $t_{df}$  is the degree of freedom for the  $t$ -distribution. The key modification is the modeling of feature space similarity  $Q$ , from Gaussian to Cauchy distribution ( $t_{df} = 1$ ) as suggested by Van der Maaten & Hinton (2008) to avoid the crowding problem and accommodate the dimension-deficiency in the feature space. We call the modified method  $t$ -SimCLR and we expect it to work better, especially when the feature dimension is low, or in the OOD case.



Table 1: Domain transfer results of vanilla MoCo-v2 and  $t$ -MoCo-v2.

| Method       | Aircraft     | Birdsnap     | Caltech101   | Cars         | CIFAR10      | CIFAR100     | DTD          | Pets         | SUN397       | Avg.         |
|--------------|--------------|--------------|--------------|--------------|--------------|--------------|--------------|--------------|--------------|--------------|
| MoCo-v2      | 82.75        | 44.53        | 83.31        | 85.24        | 95.81        | 72.75        | <b>71.22</b> | 86.70        | 56.05        | 75.37        |
| $t$ -MoCo-v2 | <b>82.78</b> | <b>53.46</b> | <b>86.81</b> | <b>86.17</b> | <b>96.04</b> | <b>78.32</b> | 69.20        | <b>87.95</b> | <b>59.30</b> | <b>77.78</b> |

Table 2: OOD accuracies of vanilla MoCo-v2 and  $t$ -MoCo-v2 on domain generalization benchmarks.

| Method       | PACS        | VLCS        | Office-Home | Avg.        |
|--------------|-------------|-------------|-------------|-------------|
| MoCo-v2      | 58.5        | 70.4        | 36.6        | 55.2        |
| $t$ -MoCo-v2 | <b>61.3</b> | <b>75.1</b> | <b>42.1</b> | <b>59.5</b> |

Figure 2(b) shows the comparison of SimCLR vs.  $t$ -SimCLR on CIFAR-10 with different feature dimensions, where  $t$ -SimCLR has significant advantages in all cases and the smaller the  $d_z$ , the larger the gap. Without decreasing the standard  $d_z = 128$ ,  $t$ -SimCLR improves the baseline from 80.8% to 83.9% and even beats it using only  $d_z = 8$  with accuracy 81.7%.

**Remark 4.1** (Degree of freedom). Standard  $t$ -SNE utilizes  $t$ -distribution with  $t_{df} = 1$ , to better accommodate the extreme  $d_z = 2$  case. In practice,  $t_{df}$  can vary and as  $d_z$  increases, larger  $t_{df}$  might be preferred. We recommend using  $t_{df} = 5$  as the default choice. The performance of  $t_{df}$  vs  $d_z$  can be found in Appendix B as well as discussion on the fundamental difference between  $t_{df}$  and  $\tau$ .

**Remark 4.2** (Training epochs). For the CIFAR-10 experiments, we reported the results of ResNet-18 after 200 training epochs, similar to the setting of Yeh et al. (2021). We also conducted 1000-epoch experiments and found that our modifications provide consistent improvements throughout the training process, not in terms of speeding up the convergence, but converging to better solutions. Details can be found in Appendix B.1

## 5 LARGE SCALE EXPERIMENTS

In this section, we apply the same modification mentioned in Section 4.2 to MoCo-v2 (Chen et al., 2020b), as it is more device-friendly to conduct large scale experiments. We name our model  $t$ -MoCo-v2. Both models are pre-trained for 200 epochs on ImageNet following the setting of Chen et al. (2020b). The linear probing accuracy of  $t$ -MoCo-v2 on ImageNet is 67.0%, which is comparable to the MoCo result 67.5%. With the same level of in-distribution classification accuracy, we conduct extensive experiments to compare their OOD performance. The results in Table 1 and 2 suggest that our modification significantly improves the domain transfer and the OOD generalization ability without sacrificing in-distribution accuracy.

**Domain Transfer.** We first conduct experiments on the traditional self-supervision domain transfer benchmark. We compare MoCo-v2 and  $t$ -MoCo-v2 on Aircraft, Birdsnap, Caltech101, Cars, CIFAR10, CIFAR100, DTD, Pets, and SUN397. We follow transfer settings in Ericsson et al. (2021) to finetune the pre-trained models. The results are reported in Table 1. Our model  $t$ -MoCo-v2 surpasses MoCo-v2 in 8 out of 9 datasets, showing a significantly stronger transfer ability. Notice that our model is pre-trained with 200 epochs, surprisingly, compared with the original MoCo-v2 model pre-trained with 800 epochs, the fine-tuning results of  $t$ -MoCo-v2 are still better on Birdsnap, Caltech101, CIFAR100, and SUN397.

**Out-of-domain generalization.** As illustrated in Section 3.1.4, standard SSCL methods, e.g., SimCLR, MoCo, etc., could suffer from OOD shift. To demonstrate the advantage of our modification, we investigate the effectiveness of our method on OOD generalization benchmarks: PACS Li et al. (2017), VLCS Fang et al. (2013), Office-Home Venkateswara et al. (2017). We follow the standard way to conduct the experiment, i.e., choosing one domain as the test domain and using the remaining domains as training domains, which is named the leave-one-domain-out protocol. As can be seen in Table 2, our  $t$ -MoCo-v2 indicates significant improvement over MoCo-v2. Both experiments indicate our modification exhibits substantial enhancement for domain transfer and OOD generalization ability. Similar to domain transfer scenario, compared with the original MoCo-v2 model pre-trained with 800 epochs,  $t$ -MoCo-v2 is better on all of the three datasets. More experiment details, including detailed comparisons, are in Appendix B.

## 6 DISCUSSION

This work proposes a novel perspective that interprets SSCL methods as a type of SNE methods, which facilitates both deeper theoretical understandings of SSCL, and methodological guidelines for practical improvement. Our analysis has limitations and the insights from SNE are not universally applicable for all SSCL methods, e.g., Zbontar et al. (2021); Yang et al. (2021) don't fit in our framework. However, this work is an interesting addition to existing theoretical works of SSCL and more investigations can be made along this path.

While there are various extensions of the classic SNE, in this work, as a proof of concept, we mainly showcased practical improvements from t-SNE and we expect more effective modifications to SSCL training objective can be developed by borrowing advances in the SNE literature, e.g., changing to  $f$ -divergences (Im et al., 2018) or consider optimal transport (Bunne et al. (2019); Salmona et al. (2021); Mialon et al. (2020)). On the other hand, standard SNE methods can borrow existing techniques in SSCL to improve their performance on more complicated data, e.g., incorporating data augmentations instead of or on top of pre-defined distances. In this sense, by choosing feature dimension to be 2, various SSCL methods can also be used as data visualization tools. Specifically on CIFAR-10, standard t-SNE can barely reveal any clusters while our t-SimCLR with  $d_z = 2$  produces much more separation among different labels. More details can be found in Appendix B.7.

## REFERENCES

- Martin Arjovsky, Léon Bottou, Ishaan Gulrajani, and David Lopez-Paz. Invariant risk minimization. *arXiv preprint arXiv:1907.02893*, 2019.
- Sanjeev Arora, Wei Hu, and Pravesh K Kothari. An analysis of the t-sne algorithm for data visualization. In *Conference On Learning Theory*, pp. 1455–1462. PMLR, 2018.
- Sanjeev Arora, Hrishikesh Khandeparkar, Mikhail Khodak, Orestis Plevrakis, and Nikunj Saunshi. A theoretical analysis of contrastive unsupervised representation learning. *arXiv preprint arXiv:1902.09229*, 2019.
- Shahar Azulay, Edward Moroshko, Mor Shpigel Nacson, Blake E Woodworth, Nathan Srebro, Amir Globerson, and Daniel Soudry. On the implicit bias of initialization shape: Beyond infinitesimal mirror descent. In *International Conference on Machine Learning*, pp. 468–477. PMLR, 2021.
- Philip Bachman, R Devon Hjelm, and William Buchwalter. Learning representations by maximizing mutual information across views. In *Advances in Neural Information Processing Systems*, pp. 15535–15545, 2019.
- Haoyue Bai, Rui Sun, Lanqing Hong, Fengwei Zhou, Nanyang Ye, Han-Jia Ye, S-H Gary Chan, and Zhenguo Li. Decaug: Out-of-distribution generalization via decomposed feature representation and semantic augmentation. In *Proceedings of the AAAI Conference on Artificial Intelligence*, volume 35, pp. 6705–6713, 2021.
- Randall Balestriero and Yann LeCun. Contrastive and non-contrastive self-supervised learning recover global and local spectral embedding methods. *arXiv preprint arXiv:2205.11508*, 2022.
- Charlotte Bunne, David Alvarez-Melis, Andreas Krause, and Stefanie Jegelka. Learning generative models across incomparable spaces. In *International conference on machine learning*, pp. 851–861. PMLR, 2019.
- T Tony Cai and Rong Ma. Theoretical foundations of t-sne for visualizing high-dimensional clustered data. *arXiv preprint arXiv:2105.07536*, 2021.
- Mathilde Caron, Ishan Misra, Julien Mairal, Priya Goyal, Piotr Bojanowski, and Armand Joulin. Unsupervised learning of visual features by contrasting cluster assignments. In *Advances in Neural Information Processing Systems*, 2020.
- Ting Chen, Simon Kornblith, Mohammad Norouzi, and Geoffrey Hinton. A simple framework for contrastive learning of visual representations. *arXiv preprint arXiv:2002.05709*, 2020a.

- Xinlei Chen and Kaiming He. Exploring simple siamese representation learning. In *Proceedings of the IEEE/CVF Conference on Computer Vision and Pattern Recognition*, pp. 15750–15758, 2021.
- Xinlei Chen, Haoqi Fan, Ross Girshick, and Kaiming He. Improved baselines with momentum contrastive learning. *arXiv preprint arXiv:2003.04297*, 2020b.
- T Erber and GM Hockney. Equilibrium configurations of  $n$  equal charges on a sphere. *Journal of Physics A: Mathematical and General*, 24(23):L1369, 1991.
- Linus Ericsson, Henry Gouk, and Timothy M Hospedales. How well do self-supervised models transfer? In *Proceedings of the IEEE/CVF Conference on Computer Vision and Pattern Recognition*, pp. 5414–5423, 2021.
- Chen Fang, Ye Xu, and Daniel N. Rockmore. Unbiased metric learning: On the utilization of multiple datasets and web images for softening bias. *2013 IEEE International Conference on Computer Vision*, pp. 1657–1664, 2013.
- Hongchao Fang, Sicheng Wang, Meng Zhou, Jiayuan Ding, and Pengtao Xie. Cert: Contrastive self-supervised learning for language understanding. *arXiv preprint arXiv:2005.12766*, 2020.
- Tianyu Gao, Xingcheng Yao, and Danqi Chen. Simcse: Simple contrastive learning of sentence embeddings. *arXiv preprint arXiv:2104.08821*, 2021.
- John M Giorgi, Osvald Nitski, Gary D Bader, and Bo Wang. Declutr: Deep contrastive learning for unsupervised textual representations. *arXiv preprint arXiv:2006.03659*, 2020.
- Jean-Bastien Grill, Florian Strub, Florent Althé, Corentin Tallec, Pierre H Richemond, Elena Buchatskaya, Carl Doersch, Bernardo Avila Pires, Zhaohan Daniel Guo, Mohammad Gheshlaghi Azar, et al. Bootstrap your own latent: A new approach to self-supervised learning. *arXiv preprint arXiv:2006.07733*, 2020.
- Ishaan Gulrajani and David Lopez-Paz. In search of lost domain generalization. In *International Conference on Learning Representations*, 2021.
- Thomas Hamm and Ingo Steinwart. Adaptive learning rates for support vector machines working on data with low intrinsic dimension. *The Annals of Statistics*, 49(6):3153–3180, 2021.
- Jeff Z HaoChen, Colin Wei, Adrien Gaidon, and Tengyu Ma. Provable guarantees for self-supervised deep learning with spectral contrastive loss. *Advances in Neural Information Processing Systems*, 34, 2021.
- Jeff Z HaoChen, Colin Wei, Ananya Kumar, and Tengyu Ma. Beyond separability: Analyzing the linear transferability of contrastive representations to related subpopulations. *arXiv preprint arXiv:2204.02683*, 2022.
- Kaiming He, Xiangyu Zhang, Shaoqing Ren, and Jian Sun. Deep residual learning for image recognition. In *Proceedings of the IEEE conference on computer vision and pattern recognition*, pp. 770–778, 2016.
- Kaiming He, Haoqi Fan, Yuxin Wu, Saining Xie, and Ross Girshick. Momentum contrast for unsupervised visual representation learning. In *Proceedings of the IEEE/CVF Conference on Computer Vision and Pattern Recognition*, pp. 9729–9738, 2020a.
- Yue He, Zheyang Shen, and Peng Cui. Towards non-iid image classification: A dataset and baselines. *Pattern Recognition*, pp. 107383, 2020b.
- Geoffrey Hinton and Sam T Roweis. Stochastic neighbor embedding. In *NIPS*, volume 15, pp. 833–840. Citeseer, 2002.
- Geoffrey E. Hinton, Simon Osindero, and Yee Whye Teh. A fast learning algorithm for deep belief nets. *Neural Computation*, 18:1527–1554, 2006.
- R Devon Hjelm, Alex Fedorov, Samuel Lavoie-Marchildon, Karan Grewal, Phil Bachman, Adam Trischler, and Yoshua Bengio. Learning deep representations by mutual information estimation and maximization. *arXiv preprint arXiv:1808.06670*, 2018.

- Weiran Huang, Mingyang Yi, and Xuyang Zhao. Towards the generalization of contrastive self-supervised learning. *arXiv preprint arXiv:2111.00743*, 2021.
- Daniel Jiwoong Im, Nakul Verma, and Kristin Branson. Stochastic neighbor embedding under f-divergences. *arXiv preprint arXiv:1811.01247*, 2018.
- Wenlong Ji, Zhun Deng, Ryumei Nakada, James Zou, and Linjun Zhang. The power of contrast for feature learning: A theoretical analysis. *arXiv preprint arXiv:2110.02473*, 2021.
- Li Jing, Pascal Vincent, Yann LeCun, and Yuandong Tian. Understanding dimensional collapse in contrastive self-supervised learning. *arXiv preprint arXiv:2110.09348*, 2021.
- Alex Krizhevsky. Learning multiple layers of features from tiny images. *University of Toronto*, 2009.
- David Krueger, Ethan Caballero, Joern-Henrik Jacobsen, Amy Zhang, Jonathan Binas, Dinghui Zhang, Remi Le Priol, and Aaron Courville. Out-of-distribution generalization via risk extrapolation (rex). In *International Conference on Machine Learning*, pp. 5815–5826. PMLR, 2021.
- Da Li, Yongxin Yang, Yi-Zhe Song, and Timothy M. Hospedales. Deeper, broader and artier domain generalization. *2017 IEEE International Conference on Computer Vision (ICCV)*, pp. 5543–5551, 2017.
- Yunfan Li, Peng Hu, Zitao Liu, Dezhong Peng, Joey Tianyi Zhou, and Xi Peng. Contrastive clustering. In *2021 AAAI Conference on Artificial Intelligence (AAAI)*, 2021.
- Zengyi Li, Yubei Chen, Yann LeCun, and Friedrich T. Sommer. Neural manifold clustering and embedding. *ArXiv*, abs/2201.10000, 2022.
- George C Linderman and Stefan Steinerberger. Clustering with t-sne, provably. *SIAM Journal on Mathematics of Data Science*, 1(2):313–332, 2019.
- Yao Lu, Jukka Corander, and Zhirong Yang. Doubly stochastic neighbor embedding on spheres. *Pattern Recognition Letters*, 128:100–106, 2019.
- JBM Melisseny. How different can colours be? maximum separation of points on a spherical octant. *Proceedings of the Royal Society of London. Series A: Mathematical, Physical and Engineering Sciences*, 454(1973):1499–1508, 1998.
- Grégoire Mialon, Dexiong Chen, Alexandre d’Aspremont, and Julien Mairal. A trainable optimal transport embedding for feature aggregation. In *International Conference on Learning Representations (ICLR)*, 2020.
- Edward Moroshko, Blake E Woodworth, Suriya Gunasekar, Jason D Lee, Nati Srebro, and Daniel Soudry. Implicit bias in deep linear classification: Initialization scale vs training accuracy. *Advances in neural information processing systems*, 33:22182–22193, 2020.
- Aaron van den Oord, Yazhe Li, and Oriol Vinyals. Representation learning with contrastive predictive coding. *arXiv preprint arXiv:1807.03748*, 2018.
- Alec Radford, Jong Wook Kim, Chris Hallacy, Aditya Ramesh, Gabriel Goh, Sandhini Agarwal, Girish Sastry, Amanda Askell, Pamela Mishkin, Jack Clark, et al. Learning transferable visual models from natural language supervision. In *International Conference on Machine Learning*, pp. 8748–8763. PMLR, 2021.
- Noam Razin and Nadav Cohen. Implicit regularization in deep learning may not be explainable by norms. *Advances in neural information processing systems*, 33:21174–21187, 2020.
- Antoine Salmona, Julie Delon, and Agnès Desolneux. Gromov-wasserstein distances between gaussian distributions. *arXiv preprint arXiv:2104.07970*, 2021.
- Nikunj Saunshi, Jordan Ash, Surbhi Goel, Dipendra Misra, Cyril Zhang, Sanjeev Arora, Sham Kakade, and Akshay Krishnamurthy. Understanding contrastive learning requires incorporating inductive biases. *arXiv preprint arXiv:2202.14037*, 2022.
- Pieter Merkus Lambertus Tammes. On the origin of number and arrangement of the places of exit on the surface of pollen-grains. *Recueil des travaux botaniques néerlandais*, 27(1):1–84, 1930.

- Yonglong Tian, Dilip Krishnan, and Phillip Isola. Contrastive multiview coding. *arXiv preprint arXiv:1906.05849*, 2019.
- Yonglong Tian, Chen Sun, Ben Poole, Dilip Krishnan, Cordelia Schmid, and Phillip Isola. What makes for good views for contrastive learning? *arXiv preprint arXiv:2005.10243*, 2020.
- Christopher Tosh, Akshay Krishnamurthy, and Daniel Hsu. Contrastive learning, multi-view redundancy, and linear models. *arXiv preprint arXiv:2008.10150*, 2020.
- Laurens Van Der Maaten. Learning a parametric embedding by preserving local structure. In *Artificial intelligence and statistics*, pp. 384–391. PMLR, 2009.
- Laurens Van der Maaten and Geoffrey Hinton. Visualizing data using t-sne. *Journal of machine learning research*, 9(11), 2008.
- Hemanth Venkateswara, Jose Eusebio, Shayok Chakraborty, and Sethuraman Panchanathan. Deep hashing network for unsupervised domain adaptation. *2017 IEEE Conference on Computer Vision and Pattern Recognition (CVPR)*, pp. 5385–5394, 2017.
- Vikas Verma, Thang Luong, Kenji Kawaguchi, Hieu Pham, and Quoc Le. Towards domain-agnostic contrastive learning. In *International Conference on Machine Learning*, pp. 10530–10541. PMLR, 2021.
- Haonan Wang, Jieyu Zhang, Qi Zhu, and Wei Huang. Augmentation-free graph contrastive learning. *arXiv preprint arXiv:2204.04874*, 2022.
- Tongzhou Wang and Phillip Isola. Understanding contrastive representation learning through alignment and uniformity on the hypersphere. In *International Conference on Machine Learning*, pp. 9929–9939. PMLR, 2020.
- Colin Wei, Kendrick Shen, Yining Chen, and Tengyu Ma. Theoretical analysis of self-training with deep networks on unlabeled data. *arXiv preprint arXiv:2010.03622*, 2020.
- Zixin Wen and Yuanzhi Li. Toward understanding the feature learning process of self-supervised contrastive learning. *arXiv preprint arXiv:2105.15134*, 2021.
- Zhirong Wu, Yuanjun Xiong, Stella X Yu, and Dahua Lin. Unsupervised feature learning via non-parametric instance discrimination. In *Proceedings of the IEEE conference on computer vision and pattern recognition*, pp. 3733–3742, 2018.
- Zhuofeng Wu, Sinong Wang, Jiatao Gu, Madian Khabsa, Fei Sun, and Hao Ma. Clear: Contrastive learning for sentence representation. *arXiv preprint arXiv:2012.15466*, 2020.
- Yuanmeng Yan, Rumei Li, Sirui Wang, Fuzheng Zhang, Wei Wu, and Weiran Xu. Consert: A contrastive framework for self-supervised sentence representation transfer. *arXiv preprint arXiv:2105.11741*, 2021.
- Ceyuan Yang, Zhirong Wu, Bolei Zhou, and Stephen Lin. Instance localization for self-supervised detection pretraining. In *Proceedings of the IEEE/CVF Conference on Computer Vision and Pattern Recognition*, pp. 3987–3996, 2021.
- Lewei Yao, Runhui Huang, Lu Hou, Guansong Lu, Minzhe Niu, Hang Xu, Xiaodan Liang, Zhenguo Li, Xin Jiang, and Chunjing Xu. Filip: Fine-grained interactive language-image pre-training. *arXiv preprint arXiv:2111.07783*, 2021.
- Chun-Hsiao Yeh, Cheng-Yao Hong, Yen-Chi Hsu, Tyng-Luh Liu, Yubei Chen, and Yann LeCun. Decoupled contrastive learning. *arXiv preprint arXiv:2110.06848*, 2021.
- Jure Zbontar, Li Jing, Ishan Misra, Yann LeCun, and Stéphane Deny. Barlow twins: Self-supervised learning via redundancy reduction. *arXiv preprint arXiv:2103.03230*, 2021.
- Chiyuan Zhang, Samy Bengio, Moritz Hardt, Benjamin Recht, and Oriol Vinyals. Understanding deep learning (still) requires rethinking generalization. *Communications of the ACM*, 64(3):107–115, 2021.



Hongyi Zhang, Moustapha Cisse, Yann N Dauphin, and David Lopez-Paz. mixup: Beyond empirical risk minimization. *arXiv preprint arXiv:1710.09412*, 2017.

Roland S Zimmermann, Yash Sharma, Steffen Schneider, Matthias Bethge, and Wieland Brendel. Contrastive learning inverts the data generating process. *arXiv preprint arXiv:2102.08850*, 2021.
